# Supplementary material for: A Poisson distribution-based general model of cancer rates and a cancer risk-dependent theory of aging
Source: Aging (Albany NY). 2023 Sep 1;15(17):8537–51. doi: 10.18632/aging.205016 (PMC10522393; doi:10.18632/aging.205016)
Supplement: Supplementary Table 1 [file aging-15-205016-s001.pdf]

## SUPPLEMENTARY TABLE

**Supplementary Table 1. List of species with different lifespan models.**

| Strategy I                     | Strategy II           | Strategy III                  |
|--------------------------------|-----------------------|-------------------------------|
| North American beaver          | Hippopotamus          | Humans (Hadza hunter-gathers) |
| Soay sheep                     | Eastern gorilla       | Fin whale                     |
| Cheetah                        | Brown bear            | African elephant              |
| European badger                | Blue monkey           | Killer whale                  |
| Meerkat                        | Steller sea lion      | Short-finned pilot whale      |
| Raccoon                        | Polar bear            | Chimpanzee                    |
| Lechwe                         | Steller sea lion      |                               |
| Pyrenean chamois               | Hawaiian monk seal    |                               |
| Arctic fox                     | Walrus                |                               |
| Banded mongoose                | Olive baboon          |                               |
| American red squirrel          | White-headed capuchin |                               |
| Belding's ground squirrel      | Yellow baboon         |                               |
| Golden-mantled ground squirrel | Northern fur seal     |                               |
|                                | Australian fur seal   |                               |
|                                | Japanese serow        |                               |
|                                | Plains zebra          |                               |
|                                | American bison        |                               |
|                                | Antarctic fur seal    |                               |
|                                | Bighorn sheep         |                               |
|                                | Himalayan tahr        |                               |
|                                | Leopard               |                               |
|                                | Moose                 |                               |
|                                | Red deer              |                               |
|                                | Weddell seal          |                               |
|                                | Lion                  |                               |
|                                | Reindeer              |                               |
|                                | Ring-tailed lemur     |                               |
|                                | Collared peccary      |                               |
|                                | Japanese macaque      |                               |
|                                | Yellow-bellied marmot |                               |
